# Supplementary material
Source: PubMed Central journal article supplement (PMC9131468)
Supplement: NIHMS1804048-supplement-1.pdf [file NIHMS1804048-supplement-1.pdf]

**Supplementary Table 1** International Classification of Diseases Codes Used in the Study Design and to Identify Baseline Variables.

| Diagnosis                                                         | International Classification of Diseases, Tenth Revision-Clinical Modification codes                                                                                                                                                                                                                                                                                                               |
|-------------------------------------------------------------------|----------------------------------------------------------------------------------------------------------------------------------------------------------------------------------------------------------------------------------------------------------------------------------------------------------------------------------------------------------------------------------------------------|
| Congestive heart failure                                          | I0981, I110, I130, I132, I50.XX                                                                                                                                                                                                                                                                                                                                                                    |
| Systolic heart failure                                            | I502.XX, I504.XX                                                                                                                                                                                                                                                                                                                                                                                   |
| Diastolic heart failure                                           | I503.XX                                                                                                                                                                                                                                                                                                                                                                                            |
| Type 2 MI                                                         | I21A1                                                                                                                                                                                                                                                                                                                                                                                              |
| Atrial fibrillation                                               | I48.0, I48.1, I48.2, I48.91                                                                                                                                                                                                                                                                                                                                                                        |
| Previous myocardial infarction                                    | I25.2, I22.0, I22.1, I22.2, I22.8, I22.9                                                                                                                                                                                                                                                                                                                                                           |
| Previous CABG                                                     | Z95.1, I25.7xx, I25.810, I25.812                                                                                                                                                                                                                                                                                                                                                                   |
| Previous PCI                                                      | Z95.5, Z98.61                                                                                                                                                                                                                                                                                                                                                                                      |
| Prior PPM                                                         | Z950, Z95812                                                                                                                                                                                                                                                                                                                                                                                       |
| Prior CVA                                                         | Z867.3, I69.XXX                                                                                                                                                                                                                                                                                                                                                                                    |
| Dyslipidemia                                                      | E78.XX                                                                                                                                                                                                                                                                                                                                                                                             |
| History of smoking                                                | Z72.0, Z87.891, F17.XXX                                                                                                                                                                                                                                                                                                                                                                            |
| ESRD                                                              | N186, Z992, Z9115                                                                                                                                                                                                                                                                                                                                                                                  |
| Takotsubo syndrome                                                | I51.81                                                                                                                                                                                                                                                                                                                                                                                             |
| Acute Pulmonary embolism                                          | I26XX                                                                                                                                                                                                                                                                                                                                                                                              |
| Myocarditis                                                       | I012, I40, A381, A3952, B2682, B3322, B5881, D8685, I090, I41, I514, J1082, J1182                                                                                                                                                                                                                                                                                                                  |
| Cardiogenic shock                                                 | R570, T8111XA                                                                                                                                                                                                                                                                                                                                                                                      |
| Cardiac arrest                                                    | I46, I9712XX, I9771XX, 5A12012                                                                                                                                                                                                                                                                                                                                                                     |
| Myocardial Infarction type 1, 3, 4, 5                             | I21.XXX, I22.XXX, I21.A9                                                                                                                                                                                                                                                                                                                                                                           |
| Severe sepsis/septic shock                                        | R6520, R6521, T8112XA                                                                                                                                                                                                                                                                                                                                                                              |
| <b>Procedures</b>                                                 |                                                                                                                                                                                                                                                                                                                                                                                                    |
| Percutaneous left atrial appendage occlusion                      | 02L7XXX                                                                                                                                                                                                                                                                                                                                                                                            |
| Transcatheter mitral valve repair                                 | 02UG3JZ                                                                                                                                                                                                                                                                                                                                                                                            |
| Transcatheter mitral valve replacement                            | 02RG37Z, 02RG38Z, 02RG3JZ, 02RG3KZ                                                                                                                                                                                                                                                                                                                                                                 |
| Transcatheter aortic valve replacement                            | 02RF37Z, 02RF38Z, 02RF3JZ, 02RF3KZ<br>02RF37H, 02RF38H, 02RF3JH, 2RF3KH                                                                                                                                                                                                                                                                                                                            |
| Percutaneous coronary intervention                                | 02703XX, 02704XX, 02713XX, 02714XX, 02723XX, 02724XX, 02733XX, 02734XX, 02C03XX, 02C04XX, 02C13XX, 02C14XX, 02C23XX, 02C24XX, 02C33XX, 02C34XX                                                                                                                                                                                                                                                     |
| Coronary artery bypass grafting                                   | 0210XXX, 0211XXX, 0212XXX, 0213XXX                                                                                                                                                                                                                                                                                                                                                                 |
| Valvular surgery/repair (aortic, mitral, tricuspid, and pulmonic) | 024XXXX, 027FXXX, 027GXXX, 027HXXX, 027JXXX, 02CFXXX, 02CGXXX, 02CJXXX, 02CHXXX, 02LHXXX, 02NFXXX, 02NGXXX, 02NJXXX, 02NHXXX, 02QFXXX, 02QGXXX, 02QJXXX, 02QHXXX, 02RF0XX, 02RF4XX, 02RG0XX, 02RG37H, 02RG38H, 02RG3JH, 02RG3KH, 02RG4XX, 02RJXXX, 02RHXXX, 02THXXX, 02UFXXX, 02UG0XX, 02UG4XX, 02UG37X, 02UG38X, 02UG3KX, 02UG37E, 02UJXXX, 02UHXXX, 02WFXXX, 02WGXXX, 02WJXXX, 02WHXXX, X2RFXXX, |

CABG = coronary artery bypass grafting; CVA = cerebrovascular accident; ESRD = end-stage renal disease; MI = myocardial infarction; PCI = percutaneous coronary intervention; PPM = permanent pacemaker.

**Supplementary Table 2** Subgroup Analyses for Association of Type 2 MI with Length of Stay in Heart Failure Stratified by Type of Heart Failure, Sex Category, and Age.

| Length of Stay, Days (mean [SE]) | Type 2 MI |         | $\beta$ coefficient (95% CI)* | P Value | Interaction P Value |
|----------------------------------|-----------|---------|-------------------------------|---------|---------------------|
|                                  | No        | Yes     |                               |         |                     |
| Systolic Heart Failure           | 5(0.03)   | 5(0.09) | 0.46(0.31-0.62)               | <.001   | .263                |
| Diastolic Heart Failure          | 5(0.02)   | 6(0.08) | 0.58(0.44-0.71)               | <.001   |                     |
| Male                             | 5(0.03)   | 5(0.07) | 0.42(0.29-0.55)               | <.001   | .005                |
| Female                           | 5(0.02)   | 6(0.08) | 0.67(0.53-0.81)               | <.001   |                     |
| Age <75 years                    | 5(0.03)   | 6(0.09) | 0.49(0.34-0.63)               | <.001   | .827                |
| Age $\geq$ 75 years              | 5(0.02)   | 6(0.07) | 0.57(0.45-0.69)               | <.001   |                     |

CI = confidence interval; MI = myocardial infarction; OR = odds ratio; SE = standard error.

\*Multivariate model adjusted for age, sex, admission status, and all baseline/hospital characteristics listed in Table 1

**Supplementary Table 3** Subgroup Analyses for Association of type 2 MI with Hospital Costs in Heart Failure Stratified by Type of Heart Failure, Sex Category, and Age.

| Hospital costs, (mean [SE]) US\$ | Type 2 MI     |               | $\beta$ coefficient (95% CI)* | P Value | Interaction P Value |
|----------------------------------|---------------|---------------|-------------------------------|---------|---------------------|
|                                  | No            | Yes           |                               |         |                     |
| Systolic Heart Failure           | 10,829(125.2) | 12,438(303.6) | 1436(907-1965)                | <.001   | .01                 |
| Diastolic Heart Failure          | 10,302(87.2)  | 12,519(253.6) | 2103(1684-2522)               | <.001   |                     |
| Male                             | 10,753(108.6) | 12,428(252.8) | 1508(1070-1946)               | <.001   | .003                |
| Female                           | 10,408(89.9)  | 12,696(263.8) | 2145(1697-2593)               | <.001   |                     |
| Age <75 years                    | 11,189(124)   | 13,179(304.4) | 1771(1259-2284)               | <.001   | .599                |
| Age $\geq$ 75 years              | 9981(86.6)    | 11,946(237.3) | 1804(1392-2217)               | <.001   |                     |

CI = confidence interval; MI = myocardial infarction; OR = odds ratio; SE = standard error.

\*Multivariate model adjusted for age, sex, admission status, and all baseline/hospital characteristics listed in Table 1.

**Supplementary Table 4** Subgroup Analyses for Association of type 2 MI with Discharge to Nursing Facility in Heart Failure Stratified by Type of Heart Failure, Sex Category, and Age.

| Discharge to Nursing Facility | Type 2 MI     |            | Adjusted OR (95% CI)* | P Value | Interaction P Value |
|-------------------------------|---------------|------------|-----------------------|---------|---------------------|
|                               | No            | Yes        |                       |         |                     |
| Systolic Heart Failure        | 55,783(15.3)  | 2085(18.4) | 1.19(1.09-1.29)       | <.001   | .055                |
| Diastolic Heart Failure       | 99,507(23.1)  | 2974(28.4) | 1.30(1.22-1.39)       | <.001   |                     |
| Male                          | 84,885(15.8)  | 3061(18.8) | 1.18(1.09-1.27)       | <.001   | .217                |
| Female                        | 116,784(23.1) | 3470(27.7) | 1.25(1.17-1.34)       | <.001   |                     |
| Age <75 years                 | 59,099(11.3)  | 1716(12.3) | 1.12(1.04-1.21)       | .003    | .012                |
| Age $\geq$ 75 years           | 142,569(27.4) | 4815(32.5) | 1.27(1.19-1.35)       | <.001   |                     |

CI = confidence interval; MI = myocardial infarction; OR = odds ratio; SE = standard error.

Numbers are frequency (%).

\*Multivariate model adjusted for age, sex, admission status, and all baseline/hospital characteristics listed in Table 1.

**Supplementary Table 5** Subgroup Analyses for Association of type 2 MI with 30-Day All-Cause Readmission in Heart Failure Stratified by Type of Heart Failure, Sex Category, and Age.

| 30-Day All-Cause Readmission* | Type 2 MI    |            | Adjusted OR (95% CI) <sup>†</sup> | P Value | Interaction P Value |
|-------------------------------|--------------|------------|-----------------------------------|---------|---------------------|
|                               | No           | Yes        |                                   |         |                     |
| Systolic Heart Failure        | 64,968(21.7) | 2045(22.2) | 1.02(0.95-1.10)                   | .631    | .262                |
| Diastolic Heart Failure       | 76,317(21.1) | 1919(22.5) | 1.07(0.99-1.15)                   | .089    |                     |
| Male                          | 92,945(21.5) | 2845(22.0) | 1.01(0.95-1.08)                   | .71     | .025                |
| Female                        | 86,731(20.9) | 2342(23.1) | 1.12(1.04-1.21)                   | .002    |                     |
| Age <75 years                 | 92,731(22.1) | 2536(22.9) | 1.01(0.94-1.10)                   | .75     | .111                |
| Age $\geq$ 75 years           | 86,984(20.3) | 2651(22.2) | 1.11(1.04-1.18)                   | .003    |                     |

CI = confidence interval; MI = myocardial infarction; OR = odds ratio; SE = standard error.

Numbers are frequency (%).

\*Among patients discharged alive.

<sup>†</sup>Multivariate model adjusted for age, sex, admission status, and all baseline/hospital characteristics listed in Table 1.
